# **A new role of low barrier hydrogen bond in mediating protein stability by small molecules**

Jianhong Yang<sup>1#</sup>, Yong Li<sup>1#</sup>, Qiang Qiu<sup>1#</sup>, Ruihan Wang<sup>2#</sup>, Wei Yan<sup>1</sup>, Yamei Yu<sup>1</sup>, Lu Niu<sup>1</sup>, Heying Pei<sup>1</sup>, Haoche Wei<sup>1</sup>, Liang Ouyang<sup>1</sup>, Haoyu Ye<sup>1</sup>, Dingguo Xu<sup>2</sup>, Yuquan Wei<sup>1</sup>, Qiang Chen<sup>1\*</sup>, Lijuan Chen<sup>1\*</sup>

<sup>1</sup> Laboratory of Natural and targeted small molecule drugs, State Key Laboratory of Biotherapy and Cancer Center, National Clinical Research Center for Geriatrics, West China Hospital, Sichuan University and Collaborative Innovation Center of Biotherapy, Chengdu, 610041, China

<sup>2</sup> MOE Key Laboratory of Green Chemistry and Technology, College of Chemistry, Sichuan University, Chengdu, Sichuan, 610064, China

<sup>#</sup>These authors equally contribute to this work.

Correspondence should be addressed to L.C. (email: chenlijuan125@163.com)

Additional corresponding authors: Q.C. ([qiang\\_chen@scu.edu.cn](mailto:qiang_chen@scu.edu.cn)).

18

# 19 ***Abstract***

20 Low barrier hydrogen bond (LBHB) is a special type of hydrogen bond which occurs  
 21 where two heteroatoms with similar  $pK_a$  values share a single proton resulting in an  
 22 unusually strong and short hydrogen bond. LBHBs in protein play important roles in  
 23 enzyme catalysis and maintaining protein structural integrity but its other biochemical  
 24 roles are unknown. Here we report a novel function of LBHB in selectively inducing  
 25 tubulin protein degradation. A tubulin inhibitor, 3-(3-Phenoxybenzyl) amino- $\beta$ -  
 26 carboline (PAC), promotes selective degradation of  $\alpha\beta$ -tubulin heterodimers by binding  
 27 to the colchicine site of  $\beta$ -tubulin. Biochemical studies have revealed that PAC  
 28 specifically destabilizes tubulin, making it prone to aggregation that then predisposes it  
 29 to ubiquitinylation and then degradation. Structural activity analyses have indicated that  
 30 the destabilization is mediated by a single hydrogen bond formed between the pyridine  
 31 nitrogen of PAC and  $\beta$ Glu198, which is identified as a LBHB. In contrast, another two  
 32 tubulin inhibitors only forming normal hydrogen bonds with  $\beta$ Glu198 exhibit no  
 33 degradation effect. Thus, the LBHB accounts for the degradation. Most importantly, we  
 34 screened for compounds capable of forming LBHB with  $\beta$ Glu198 and demonstrated  
 35 that BML284, a Wnt signaling activator, also promotes tubulin heterodimers  
 36 degradation in a PAC-like manner as expected. Our study has identified a novel  
 37 approach for designing tubulin degraders, providing a unique example of LBHB  
 38 function and suggests that designing small molecules to form LBHBs with protein  
 39 residues resulting in the highly specific degradation of a target protein could be a new

strategy for drug development.

**Key words:** Tubulin degrader; Low barrier hydrogen bond; Drug design; Protein stability; Protein degradation.

## ***1.Introduction***

Hydrogen bond was firstly discovered almost a century ago and it played an important role in physics, chemistry and biology [1]. In life science, it is extremely important for various biological processes, including the formation of DNA double helix structure, protein secondary structure, protein folding and stability, enzyme catalysis, drugs binding and molecular recognition [2-7]. A special hydrogen bond named low barrier hydrogen bond (LBHB) was first proposed in 1990s [8, 9]. LBHB is distinguished from conventional hydrogen bond by equally proton sharing between two heteroatoms [10]. These two heteroatoms usually have similar  $pK_a$  values and form an unusually strong and short ( $\leq 2.65$  Å for O-N pairs) hydrogen bond [3, 11, 12]. The proton of an LBHB lies in the middle of the two heteroatoms and precise location of the proton by experiment could provide direct evidence of existence of LBHB [13]. To locate the proton of an LBHB in a protein can only be done by ultra-high-resolution (1.0 Å or less) X-ray or neutron crystallography while it is technically difficult for most proteins [13]. Moreover, theoretical methods such as quantum mechanics/molecular mechanics (QM/MM) calculation of potential-energy curves of proton has been widely used to predict LBHB [13-15]. Formation of an LBHB can supply 10-20 kcal/mol energy which

can facilitate difficult biochemical reaction [9]. Thus, LBHB is regarded to be responsible for catalytic efficiencies of several enzymes including aspartate aminotransferase, ketosteroid isomerase, citrate synthase, serine proteases and aminoglycoside-N3-acetyltransferase Via [16-20]. Besides, LBHBs are needed to maintain protein structural integrity in proteins including rhamnogalacturonan acetyltransferase D192N mutant and human transketolase [21, 22]. However, other biochemical roles of LBHBs are rarely reported.

LBHBs is also formed between small-molecule ligand and proteins, such as human transketolase and periplasmic phosphate-binding proteins, to mediate ligand binding and selectivity, implying LBHBs have the potential to be used for high selective drug design [22, 23]. The intermolecular hydrogen bond between carboxylic acid and pyridine was extensively studied and both experimental and theoretical calculation evidences revealed this intermolecular hydrogen could be an LBHB [24-26]. Most recently, an LBHB was found between pyrimidyl of thiamine and carboxyl of glu366 in human transketolase through ultra-high-resolution X-ray crystallography [22]. Thus, it is possible that an LBHB could exist between inhibitors (containing pyridine or pyridine-like function group) and its target protein and may have special biochemical functions.

A synthetic compound, 3-(3-Phenoxybenzyl)amino- $\beta$ -carboline (PAC, Fig 1a), belongs to the class of known anti-cancer natural products [27] denoted  $\beta$ -carboline derivatives [28-30]. PAC is a potent tubulin inhibitor with nanomolar IC<sub>50</sub> values in several tumor cells [30]. Tubulin is a validated target for a wide range of tumors and several drugs,



including paclitaxel, eribulin and vinca alkaloids, that inhibit the polymerization or depolymerization of tubulin are in clinical use [31, 32]. We have determined that PAC has a novel mode of action beyond simple inhibition of tubulin polymerization. We show that PAC when given in relevant doses results in the specific degradation of tubulin by the ubiquitin pathway. Our data indicate that ubiquitinylation is a response to destabilization and aggregation of tubulin. Structural activity analysis reveals that an LBHB between pyrimidyl of PAC and carboxyl of  $\beta$ Glu198 underpins the degradation. While another two compounds forming normal hydrogen bonds with  $\beta$ Glu198 exhibited no tubulin degradation effect. We screened for other compounds that can form LBHB with  $\beta$ Glu198 and identified that BML284, a Wnt signaling activator also promoted tubulin heterodimers degradation in a PAC like manner.

Our study demonstrated a new role of LBHB in mediating protein stability by small molecules, identified a novel approach to design tubulin degraders and suggest a new strategy for drug development, designing small molecules to form LBHBs with protein residues resulting in the highly specific degradation of a target protein. Also, the interaction between the carboxylic acid and pyridine or pyridine-like function group could be used as a model to design drugs forming LBHB with target protein.

## 2. Results

### 2.1 PAC selectively downregulates the protein level of tubulin heterodimers

PAC (Fig. 1a) showed high anticancer activity *in vitro* [33], and is identified as a tubulin inhibitor [30]. PAC induced obvious G2/M phase cell cycle arrest on human cervical adenocarcinoma cell line HeLa and human colon colorectal carcinoma cell line Hct116 (Fig. S1a) and caspase-dependent apoptosis on HeLa cells (Fig. S1b). PAC significantly and dose-dependently inhibited tumor growth of both human large cell lung carcinoma cell line H460 and Hct116 xenografts (Fig. S1c and S1d). To illuminate the cellular effect of PAC in an early time point, we employed a tandem mass tag (TMT) quantitative proteomic analysis of six-hour PAC treated HeLa cells, and demonstrated that PAC could specifically downregulate the protein level of  $\alpha$ - and  $\beta$ -tubulin and their subtypes (Fig. 1b). The biological processes and cellular components analysis of the quantitative proteomic data showed that the mitotic cell cycle was the most effected biological process and cytoskeleton was the most effected cellular component in response to PAC treatment (Fig. S2a and S2b). These results were consistent with tubulin reduction since tubulin is the main component of cytoskeleton and plays an important role in mitosis [34]. Immunoblot analysis similarly exhibited clear reduction of  $\alpha$ - and  $\beta$ -protein in HeLa, Hct116, H460 and human B cell lymphoma cell SU-DHL-6 in a dose (Fig. 1c) and time dependent manner for HeLa and Hct116 cells (Fig. 1d). A qPCR assay confirmed that the drop in level of  $\alpha\beta$ -tubulin proteins is post transcriptional, since mRNA levels of  $\alpha\beta$ -tubulin in HeLa and Hct116 showed no such time dependence (Fig. S3a and S3b). We also found PAC administration reduced the protein level of tubulin in tumor tissue of an Hct116 xenograft model (Fig. S3c). *In vitro*

tubulin polymerization assay showed that PAC directly binds to purified tubulin and inhibits tubulin polymerization in a concentration dependent manner (**Fig.S3d**). Of all the widely known tubulin-binding agents we have tested, only PAC could induce the degradation of tubulin (**Fig.1e**). To identify the binding site of PAC on tubulin and whether the binding of PAC to tubulin accounts for the degradation effect, we carried out competition assays and found that colchicine, but not vinblastine, maytansine or pironetin inhibit PAC-induced tubulin degradation, suggesting that PAC exerts its effect by binding to the colchicine site (**Fig.1f**). All these indicated PAC induces selective tubulin degradation by binding to the colchicine site.

## **2.2 PAC specifically destabilizes tubulin making it prone to aggregation that then predisposes it to ubiquitinylation**

HeLa cells were pretreated with various inhibitors, including lysosome inhibitor NH<sub>4</sub>Cl, proteasome inhibitor MG132, autophagy inhibitor 3-MA. Only the proteasome inhibitor MG132 completely blocked PAC-induced tubulin degradation (**Fig.2a** and **S4a**), suggesting proteasome pathway is responsible for the tubulin degradation. Immunoblot analysis of immunoprecipitated  $\alpha$ - and  $\beta$ -tubulin by ubiquitin antibody showed that PAC treatment has significantly increased the ubiquitinylation level of  $\alpha$ - and  $\beta$ -tubulin (**Fig.S4b**), whereas no such obvious effect on the general ubiquitinylation level of the total proteins (**Fig.S4c**) was observed. PYR-41, a specific inhibitor for ubiquitin-activating enzyme E1, completely inhibited PAC-induced tubulin degradation (**Fig.2a**), suggesting PAC induced tubulin degradation relied on ubiquitinylation. Cells pretreated with MG132 (or PYR-41) possessed aggregates of tubulin in cytoplasm after

PAC treatment (**Fig.2b**). Size-exclusion chromatography also revealed that PAC treatment resulted in purified tubulin aggregation *in vitro* (**Fig.2c**), which was further confirmed by transmission electron microscope (TEM) with lots of different size spherical tubulin aggregates observed (**Fig.2d**). We speculated that PAC might promote denaturation of tubulin and ubiquitinylation arise from normal protein clearance. Using a Thiol Fluorescent Detection Kit the denaturation of both tubulin and bovine serum albumin (BSA) were studied. While PAC showed no denaturation effect on BSA, it promoted denaturation of tubulin at low concentrations, an effect that was inhibited by pretreatment with colchicine (**Fig.2e**), confirming PAC induces selective denaturation of tubulin *in vitro*. Differential scanning fluorimetry results indicated tubulin treated with PAC showed obvious lower transition midpoint ( $T_m$ ) whereas colchicine had no effect (**Fig.2f**), demonstrating PAC decreases the stability of tubulin *in vitro*. We conclude then that PAC specifically destabilizes tubulin making it prone to aggregation that then predisposes it to ubiquitinylation.

### 2.3 Crystal structure of tubulin-PAC complex

Crystals of a protein complex composed of two  $\alpha\beta$ -tubulin heterodimers, the stathmin-like protein RB3 and tubulin tyrosine ligase (T2R-TTL) [35] were soaked with PAC and the resulting complex determined to 2.65 Å resolution (**Fig.3a**). Details of the data collection and refinement statistics are summarized in **Supplementary Table 1**. The  $F_o - F_c$  difference electron density identified there was a PAC molecule on each of  $\beta 1$ -tubulin and  $\beta 2$  tubulin (**Fig.3b**). Our previous structure-based pharmacophore for colchicine binding site inhibitors (CBSIs) suggest there are five recognition centers:

three hydrophobic centers (I, II and III) and two hydrogen bond centers (IV and V) [36].

In this tubulin-PAC complex, PAC occupied hydrophobic centers I and II where it makes extensive van der Waal contacts (**Fig.3c**). PAC forms hydrogen bonds with the side chains of  $\beta$ E198 and  $\beta$ Y200 in hydrogen bond center IV (**Fig.3c**). Compared to the colchicine complex (PDB:4O2B) [37], PAC was located deeper in the  $\beta$  subunit and made no interaction with  $\alpha$  subunit consequently the atoms of PAC and colchicine show only little overlap (**Fig.S5a**). Comparison between tubulin-PAC and tubulin-colchicine complex structures showed that the binding did not affect the global conformation of tubulin nor of the T2R complex. The root mean square deviation (RMSD) for 1,967 C $\alpha$  atoms between tubulin-PAC and tubulin-colchicine complexes is 0.4 Å.

## 2.4 The pyridine nitrogen of PAC and Glu198 of $\beta$ -tubulin mediate the tubulin degradation.

Informed by the crystal structure PAC-tubulin complex, we synthesized a series of PAC derivatives to identify which functional group of PAC is responsible for its tubulin degradation ability (**Fig.4a**). Compounds **9**, **10**, **11**, **14** and **15** showed anti-proliferation and promoted tubulin degradation at higher concentrations (**Fig.4b, 4c** and **S5b**). For ease of discussion, we decomposed PAC into three rings (**Fig.4a**). Since compound **9** lacked the C ring of PAC, we conclude it is not essential. The activity of compounds **10** and **11** exhibited that the B ring can be substituted by aliphatic ring or chain. The binding mode of **9**- and **11**-tubulin complexes were similar to PAC (**Fig. S5c**). Compounds **14** and **15** revealed that even the carboline ring (A ring) is not critical (**Fig 4d, 4e** and **S3b**). Compounds **20** and **24** were synthesized to probe the importance of

N-2 and -NH- group at C-3 position. Compound **20** lost both anti-proliferation and tubulin degradation activity while compound **24** retained both (**Fig. 4b, 4c** and **S5b**). We concluded that N-2 on the carboline ring is the key functional group contributing to tubulin degradation. The crystal structure of PAC-tubulin complex demonstrated that only  $\beta$ Glu198 and  $\beta$ Tyr200 make polar interactions with N-2 of PAC. PAC addition promoted wild-type like degradation of Y200F  $\beta$ -tubulins but had no effect on E198G, E198Q or E198D  $\beta$ -tubulins (**Fig.4d**). EBI assay revealed that PAC no longer bound to the colchicine site of  $\beta$ -tubulin mutants  $\beta$ E198G,  $\beta$ E198Q, or  $\beta$ E198D (**Fig.S5d**). We concluded that the hydrogen bond interaction between  $\beta$ Glu198 and the nitrogen atom at 2-position of A ring of PAC triggers tubulin degradation. However, two tubulin inhibitors, nocodazole (Noc) and plinabulin (Pli), adopt similar conformations in  $\beta$ -tubulin to PAC. and also form hydrogen bonds with  $\beta$ Glu198 (**Fig.4e**) [38], they could not cause tubulin degradation effect and block PAC-induced degradation (**Fig.4f**), suggesting that the hydrogen bond between OGlu198 and pyridine nitrogen of PAC may be special.

## **2.5 An LBHB between PAC and $\beta$ Glu198 triggers tubulin degradation**

Several previous papers have identified the formation of LBHBs between carboxyl and nitrogen of pyridyl in compounds complexes through chemical calculations, ultralow temperature NMR and cocrystal structure studies [22, 24, 26, 38], which was almost the same pattern with PAC- $\beta$ Glu198 model. We calculated that the pKa value (using Propka 3.1) of  $\beta$ Glu198 to be 9.6, indicating that it is neutral (protonated) under normal conditions. Upon PAC binding, the pKa values of  $\beta$ Glu198 and pyridine nitrogen of

PAC in the PAC-crystal structure are 2.3 and 2.5 respectively, similar enough to indicate the presence of an LBHB [39]. The interatomic distance between O<sub>Glu198</sub> and compounds in PAC-tubulin, Compound **9**-tubulin and Compound **11**-tubulin complex is ranged from 2.66 to 2.83 Å (**Fig.5a**). Hydrogen bonds length in X-Ray crystal structure is aligned longer than that in neutron crystal structure. For example, the length of the Glu198-His198 LBHB in X-ray structure of sisomicin bound AAC-Via (6BC7) is 2.84 Å, while in the neutron/X-ray structure (6BBZ) is 2.57 Å [20]. Thus, the length of O<sub>Glu198</sub>-N<sub>PAC</sub> hydrogen bond could also meet the requirement of an LBHB. Besides, in the QM/MM Optimized structure (more accurate than experimental structure for reaction mechanism study [40-42] ) the interatomic distance between O<sub>Glu198</sub> and N<sub>PAC</sub> is 2.49 Å (**Fig.S6a**), which is far smaller than the sum of their van-der-Waals radii (2.65 Å for O-N pairs) and meets the need of an LBHB. Using QM/MM calculation, a mature and widely used method for predicting LBHB [13, 22, 43-45], we found the potential energy curve of O<sub>Glu198</sub>-N<sub>PAC</sub> hydrogen has a double-well character, and the computed proton transfer barrier is 1.77 kcal/mol, which is well under the threshold that typically indicates an LBHB and is under the sum of zero point vibrational energy (ZPVE, 1.46 kcal/mol) and kT (0.596 kcal/mol) (**Fig.5b**) [14]. Besides, QM/MM molecular dynamics simulations clearly showed the proton is able to move freely between βGlu198 and PAC (**Fig.5c-d, S6b-d**). In normal hydrogen bond, the splitting of vibrational energy decreases as the vibration step rises (The |1⟩ to |2⟩ energy  $\epsilon_{21}$  is smaller than the |0⟩ to |1⟩ energy  $\epsilon_{10}$ ), while the PAC vibration energy splitting increases with the rise of the vibration step ( $\epsilon_{21} > \epsilon_{10}$ ) (**Table S2**) , resulting a superharmonicity

effect, which also suggested an LBHB [46]. In contrast, the potential energy curves and vibration energy splitting decrease ( $\varepsilon_{21} < \varepsilon_{10}$ ) of O<sub>Glu198</sub>-N<sub>Noc</sub> and O<sub>Glu198</sub>-O<sub>Pli</sub> indicate these two tubulin inhibitors could not form LBHBs (**Fig.5b and Table S2**). All these demonstrated that there is an LBHB formed between O<sub>Glu198</sub> and N<sub>PAC</sub> and the LBHB is required for the tubulin degradation effect.

## 2.6 Identification of a new tubulin degrader with the LBHB mediated degradation mechanism

To further confirm of the degradation mechanism and identify effective new tubulin degradation compounds, we screened compounds from lots of tubulin inhibitors with molecular docking and QM/MM calculation and found BML284 (**Fig.6a**), a Wnt signaling activator and tubulin inhibitor [47], might form an LBHB with  $\beta$ Glu198. Crystal structure of tubulin-BML284 complex validated that BML284 binds to colchicine site and forms a hydrogen bond with  $\beta$ Glu198 (**Fig.6b and S7a**), which was proved to be an LBHB by QM/MM calculation as validated by a symmetric double well and low barrier potential energy curve and vibration energy splitting increase ( $\varepsilon_{21} > \varepsilon_{10}$ ) (**Fig.6c and Table S2**). Superimposition of the tubulin-BML284 structure onto that of tubulin-PAC showed these two compounds overlap and both form an LBHB with  $\beta$ Glu198 in a similar manner (**Fig.S7b**). Immunoblotting results revealed BML284 indeed promotes tubulin heterodimers protein degradation in a concentration dependent manner while exhibits no effect on their mRNA levels (**Fig.6d and S7c**). The same as PAC, BML284-induced tubulin degradation could also be blocked by colchicine or PYR-41 (**Fig.6e and 6f**). TEM results confirmed that BML284 also induces spherical



tubulin aggregates formation *in vitro* (**Fig.6g**). Thiol Fluorescent Detection Kit Assay also indicated that BML284 induces purified tubulin denaturation (**Fig.6h**). Taken together, we identified a new tubulin degrader using the LBHB mediated degradation mechanism.

### 3. Discussion

The human cell flags proteins for degradation by ubiquitinylation either through specific events (for example MDM2) [48] or as normal housekeeping to remove misfolded or denatured proteins [49]. Proteins with reduced stability are prone to unfolding and therefore more efficiently cleared in the normal housekeeping [50]. Molecules which promote protein ubiquitinylation will lead to proteolytic degradation of the targeted proteins are well established medicines [51].

Our data indicate there is a new method of specifically promoting target protein degradation. PAC, a known tubulin inhibitor [30], effectively destabilizes tubulin and thereby promotes its degradation as part of normal cell housekeeping. This effect is very specific since no widespread protein destabilization was observed and the effect is distinct from compounds such as isothiocyanates or withaferin A that also promote tubulin degradation. These compounds non-specifically bind to free protein thiols and promote degradation and / or alter the function of many proteins (isothiocyanates: Nrf, CDC25, GSH, MIF, STAT3 *et al* [52] and withaferin A: vimentin, actin HSP90, annexin II *et al* [53-55]), not just tubulin [56, 57].

Interestingly the co-complex of PAC with tubulin does not reveal any significant conformational changes that could easily explain the effect. However, structure-

activity-relationship analysis using variants of PAC and site directed mutagenesis of  $\beta$ -tubulin, identifies a single key interaction, that between the pyridine nitrogen of PAC and  $\beta$ Glu198 (interior hydrophobic region of  $\beta$ -tubulin) as the trigger for degradation. Detailed calculations study show these two groups form an LBHB whilst other inhibitors, Noc and Pli, form only normal hydrogen bonds with  $\beta$ Glu198 and do not destabilize tubulin. We conclude that it is the LBHB between PAC and tubulin that destabilizes tubulin and consequently the protein is prone to unfolding and clearance via the house keeping ubiquitin system. The deep mechanism of LBHB mediate tubulin destabilization remains further investigation and here we proposed two possible hypothesizes: LBHB has unusual strong strength with some extent covalent character [46, 58], thus its abnormally strong strength could help to trap an unstable conformation of tubulin; Formation of an LBHB will release 10-20 kcal/mol energy and also the significant decrease in  $pK_a$  of  $\beta$ Glu198 (from 9.6 to 2.3) will release about 10 kcal/mol energy as calculated by  $\Delta G^\circ = 2.303RT(\Delta pK_a)$  [9, 59]. Therefore, a total 20-30 kcal/mol energy could make unfold of tubulin owing to the associated loss of net stability [60].

Using this LBHB mediated degradation mechanism we screened for compounds from lots of tubulin inhibitors with QM/MM calculation and molecular docking methods and found BML284, a Wnt signaling activator and tubulin inhibitor, can also form an LBHB with  $\beta$ Glu198 and promote tubulin degradation in a PAC-like manner as expected. Since LBHB was firstly proposed in the early 1990s, there have been few reports on other biochemical effects besides its roles in participating in enzyme catalysis and

maintain protein structural integrity [10, 21, 22]. Our study confirms a new role of LBHB in mediating protein stability by small molecules, which could be utilized for novel drug discovery.

Molecules which form LBHB with buried residues represent a powerful new strategy in medicinal chemistry. These molecules are very different from the chaotropic agents that denature most proteins, they rely on specific protein ligand interactions. In another advantage, they are smaller and more “drug” like than the large proteolysis targeting chimera type molecules. The geometric constraints of the LBHB impose a high degree of selectivity upon those molecules thus reducing, at least in theory, unwanted side effects. As we have shown there exist excellent tools to judge whether any molecule participates in such an LBHB with a protein and measurement of the effect of such an LBHB upon protein stability is straightforward. These factors mean such an approach could be widely adopted.

### **Acknowledgements**

This work was funded by funds from National Natural Science Foundation of China (81872900, 81803021 and U1402222); 1.3.5 project for disciplines of excellence, West China Hospital, Sichuan University; Post-Doctor Research Project, Sichuan University (2020SCU12036); China Postdoctoral Science Foundation Grants (2019T120855 and 2019M650248); Sichuan Science and Technology Program Grants (2019YJ0088, 2020YJ0089, 2019YFH0123 and 2019YFH0124).

### **Author contributions**

J.Y. performed most of the cellular and biochemical experiments and wrote the draft.

Y.L. synthesized all chemical compounds. Q.Q. performed the tubulin mutation and animal experiments. R.W. and D.X. performed the computational calculations. W.Y, Y.Y, L.N., and Q.C. performed the structural biology experiments. H.P., H.W., L.O. and H.Y. analyzed the data. J.Y., Q.C., W.L. and L.C. conceived the idea and supervised the study. Q.C., and L.C. revised the manuscript.

All authors approved the final manuscript.

### **Competing interests**

The authors declare no competing financial interests.

**Correspondence and requests for materials** should be addressed to Q.C. or L.C.

### **Data availability.**

Atomic coordinates and structure factors of tubulin complexed with PAC, Compound 9, Compound 11 or BML284 have been deposited in the Protein Data Bank under accession codes 7CDA, 7CE6, 7CE8 and 7CEK, respectively. All other data are available from the corresponding authors on reasonable request.

### **Reference**

- [1] Minch MJ. An introduction to hydrogen bonding (Jeffrey, George A.). ACS Publications; 1999.
- [2] Hibbert F, Emsley J. Hydrogen bonding and chemical reactivity. Advances in physical organic chemistry; Elsevier; 1990. p. 255-379.
- [3] Perrin CL, Nielson JB. "Strong" hydrogen bonds in chemistry and biology. Annual review of physical chemistry. 1997;48:511-44.
- [4] Grabowski SJ. Hydrogen bonding: new insights: Springer; 2006.
- [5] Enciso M, Rey A. Improvement of structure-based potentials for protein folding by native and nonnative hydrogen bonds. Biophysical journal. 2011;101:1474-82.
- [6] Bordo D, Argos P. The role of side-chain hydrogen bonds in the formation and stabilization of secondary structure in soluble proteins. Journal of molecular biology. 1994;243:504-19.
- [7] Shan S-o, Herschlag D. [11] Hydrogen bonding in enzymatic catalysis: Analysis of energetic contributions. Methods in enzymology; Elsevier; 1999. p. 246-76.
- [8] Cleland W. Low-barrier hydrogen bonds and low fractionation factor bases in enzymic reactions.

353 Biochemistry. 1992;31:317-9.

354 [9] Cleland W, Kreevoy MM. Low-barrier hydrogen bonds and enzymic catalysis. Science.

355 1994;264:1887-90.

356 [10] Cleland W. Low-barrier hydrogen bonds and enzymatic catalysis. Archives of Biochemistry and

357 Biophysics. 2000;382:1-5.

358 [11] Cleland WW. Low-Barrier Hydrogen Bonds and Enzymatic Catalysis ☆. Science. 1994;264:1887-

359 90.

360 [12] Nichols DA, Hargis JC, Sanishvili R, Jaishankar P, Defrees K, Smith EW, et al. Ligand-Induced

361 Proton Transfer and Low-Barrier Hydrogen Bond Revealed by X-ray Crystallography. Journal of the

362 American Chemical Society. 2015;137:8086.

363 [13] Hosur M, Chitra R, Hegde S, Choudhury R, Das A, Hosur R. Low-barrier hydrogen bonds in proteins.

364 Crystallography reviews. 2013;19:3-50.

365 [14] Nichols DA, Hargis JC, Sanishvili R, Jaishankar P, Defrees K, Smith EW, et al. Ligand-induced

366 proton transfer and low-barrier hydrogen bond revealed by X-ray crystallography. Journal of the

367 American Chemical Society. 2015;137:8086-95.

368 [15] Saito K, Ishikita H. Formation of an unusually short hydrogen bond in photoactive yellow protein.

369 Biochimica et Biophysica Acta (BBA)-Bioenergetics. 2013;1827:387-94.

370 [16] Gu Z, Drueckhammer DG, Kurz L, Liu K, Martin DP, McDermott A. Solid state NMR studies of

371 hydrogen bonding in a citrate synthase inhibitor complex. Biochemistry. 1999;38:8022-31.

372 [17] Markley JL, Westler WM. Protonation-state dependence of hydrogen bond strengths and exchange

373 rates in a serine protease catalytic triad: bovine chymotrypsinogen A. Biochemistry. 1996;35:11092-7.

374 [18] Zhao Q, Abeygunawardana C, Gittis AG, Mildvan AS. Hydrogen bonding at the active site of Δ5-

375 3-ketosteroid isomerase. Biochemistry. 1997;36:14616-26.

376 [19] Dajnowicz S, Parks JM, Hu X, Gesler K, Kovalevsky AY, Mueser TC. Direct evidence that an

377 extended hydrogen-bonding network influences activation of pyridoxal 5' -phosphate in aspartate

378 aminotransferase. Journal of Biological Chemistry. 2017;292:5970-80.

379 [20] Kumar P, Serpersu EH, Cuneo MJ. A low-barrier hydrogen bond mediates antibiotic resistance in a

380 noncanonical catalytic triad. Science advances. 2018;4:eaas8667.

381 [21] Langkilde A, Kristensen SM, Lo Leggio L, Mølgaard A, Jensen JH, Houk AR, et al. Short strong

382 hydrogen bonds in proteins: a case study of rhamnogalacturonan acetyltransferase. Acta Crystallographica

383 Section D: Biological Crystallography. 2008;64:851-63.

384 [22] Dai S, Funk L-M, von Pappenheim FR, Sautner V, Paulikat M, Schröder B, et al. Low-barrier

385 hydrogen bonds in enzyme cooperativity. Nature. 2019;573:609-13.

386 [23] Elias M, Wellner A, Goldin-Azulay K, Chabriere E, Vorholt JA, Erb TJ, et al. The molecular basis

387 of phosphate discrimination in arsenate-rich environments. Nature. 2012;491:134-7.

388 [24] Perrin C. Low-barrier hydrogen bonds in pyridine-dichloroacetic acid complexes. Polish Journal of

389 Chemistry. 2003;77:1693-702.

390 [25] Golubev NS, Smirnov SN, Tolstoy PM, Sharif S, Toney MD, Denisov GS, et al. Observation by

391 NMR of the tautomerism of an intramolecular OHOHN-charge relay chain in a model Schiff base.

392 Journal of Molecular Structure. 2007;844:319-27.

393 [26] Koeppel B, Pylaeva S, Allolio C, Sebastiani D, Nibbering E, Denisov G, et al. Polar solvent

394 fluctuations drive proton transfer in hydrogen bonded complexes of carboxylic acid with pyridines: NMR,

395 IR and ab initio MD study. Physical Chemistry Chemical Physics. 2017;19:1010-28.

396 [27] Haarmann ST, Sendker JC, Krug N, Bothe H, Fritsche E, Proksch P, et al. Regulation of dioxin

receptor function by different beta-carboline alkaloids. Archives of Toxicology. 2010;84:619-29.

[28] Wu Q, Bai Z, Ma Q, Fan W, Guo L, Zhang G, et al. Synthesis and biological evaluation of novel bivalent  $\beta$ -carbolines as potential antitumor agents. Medchemcommun. 2014;5:953-7.

[29] Zhang M, Sun D. Recent Advances of Natural and Synthetic  $\beta$ -Carbolines as Anticancer Agents. Anti-Cancer Agents in Medicinal Chemistry (Formerly Current Medicinal Chemistry - Anti-Cancer Agents). 2015;15:-.

[30] Ikeda R, Kurosawa M, Okabayashi T, Takei A, Yoshiwara M, Kumakura T, et al. 3-(3-Phenoxybenzyl)amino- $\beta$ -carboline: a novel antitumor drug targeting  $\alpha$ -tubulin. Bioorganic & Medicinal Chemistry Letters. 2011;21:4784.

[31] Yang J, Li Y, Yan W, Li W, Qiu Q, Ye H, et al. Covalent modification of Cys-239 in  $\beta$ -tubulin by small molecules as a strategy to promote tubulin heterodimer degradation. Journal of Biological Chemistry. 2019;294:8161-70.

[32] Yang J, Wang Y, Wang T, Jiang J, Botting CH, Liu H, et al. Pironetin reacts covalently with cysteine-316 of  $\alpha$ -tubulin to destabilize microtubule. Nature Communications. 2016;7:12103.

[33] Ikeda R, Kurosawa M, Okabayashi T, Takei A, Yoshiwara M, Kumakura T, et al. 3-(3-Phenoxybenzyl)amino-beta-carboline: A novel antitumor drug targeting alpha-tubulin. Bioorg Med Chem Lett. 2011;21:4784-7.

[34] Fenderson, Bruce. Molecular Biology of the Cell, 5th Edition. Shock. 2008;30.

[35] Protá AE, Bargsten K, Zurwerra D, Field JJ, Díaz JF, Altmann KH, et al. Molecular mechanism of action of microtubule-stabilizing anticancer agents. Science. 2013;339:587-90.

[36] Wang Y, Zhang H, Gigant B, Yu Y, Wu Y, Chen X, et al. Structures of a diverse set of colchicine binding site inhibitors in complex with tubulin provide a rationale for drug discovery. Febs Journal. 2016;283:102-11.

[37] Protá AE, Franck D, Felix B, Katja B, Buey RM, Jens P, et al. The novel microtubule-destabilizing drug BAL27862 binds to the colchicine site of tubulin with distinct effects on microtubule organization. Journal of Molecular Biology. 2014;426:1848-60.

[38] Bedeković N, Stilić V, Pitman T. Aromatic versus Aliphatic Carboxyl Group as a Hydrogen Bond Donor in Salts and Cocrystals of an Asymmetric Diacid and Pyridine Derivatives. Crystal Growth & Design. 2017;17:5732-43.

[39] Gilli G, Gilli P. Towards an unified hydrogen-bond theory. Journal of Molecular Structure. 2000;552:1-15.

[40] Fu Z, Li X, Merz Jr KM. Accurate assessment of the strain energy in a protein - bound drug using QM/MM X-ray refinement and converged quantum chemistry. Journal of computational chemistry. 2011;32:2587-97.

[41] Wu S, Xu D, Guo H. QM/MM Studies of Monozinc-Lactamase CphA Suggest That the Crystal Structure of an Enzyme-Intermediate Complex Represents a Minor Pathway.

[42] Li X, Hayik SA, Merz Jr KM. QM/MM X-ray refinement of zinc metalloenzymes. Journal of inorganic biochemistry. 2010;104:512-22.

[43] Mulholland AJ, Lyne PD, Karplus M. Ab initio QM/MM study of the citrate synthase mechanism. A low-barrier hydrogen bond is not involved. Journal of the American Chemical Society. 2000;122:534-5.

[44] Porter MA, Molina PA. The Low-Barrier Double-Well Potential of the O $\delta$ 1-H-O $\delta$ 1 Hydrogen Bond in Unbound HIV Protease: A QM/MM Characterization. Journal of chemical theory and computation. 2006;2:1675-84.

- [45] Schutz CN, Warshel A. The low barrier hydrogen bond (LBHB) proposal revisited: The case of the Asp<sup>+</sup> His pair in serine proteases. *Proteins: Structure, Function, and Bioinformatics*. 2004;55:711-23.
- [46] Dereka B, Yu Q, Lewis NH, Carpenter WB, Bowman JM, Tokmakoff A. Crossover from hydrogen to chemical bonding. *Science*. 2021;371:160-4.
- [47] Fukuda Y, Sano O, Kazetani K, Yamamoto K, Iwata H, Matsui J. Tubulin is a molecular target of the Wnt-activating chemical probe. *BMC biochemistry*. 2016;17:9.
- [48] Marine J-C, Lozano G. Mdm2-mediated ubiquitylation: p53 and beyond. *Cell Death & Differentiation*. 2010;17:93-102.
- [49] Goldberg AL. Protein degradation and protection against misfolded or damaged proteins. *Nature*. 2003;426:895-9.
- [50] Schrader EK, Harstad KG, Matouschek A. Targeting proteins for degradation. *Nature Chemical Biology*. 2009;5:815-22.
- [51] Lai AC, Crews CM. Induced protein degradation: an emerging drug discovery paradigm. *Nature Reviews Drug Discovery*. 2017;16:101-14.
- [52] Mi L, Pasqua AJD, Chung FL. Proteins as binding targets of isothiocyanates in cancer prevention. *Carcinogenesis*. 2011;32:1405.
- [53] Bargagnamohan P, Hamza A, Kim YE, Khuan AHY, Morvaknin N, Wendschlag N, et al. The tumor inhibitor and antiangiogenic agent withaferin A targets the intermediate filament protein vimentin. *Chemistry & Biology*. 2007;14:623-34.
- [54] Falsey RR, Marron MT, Gunaherath GMKB, Shirahatti N, Mahadevan D, Gunatilaka AAL, et al. Actin microfilament aggregation induced by withaferin A is mediated by annexin II. *Nature Chemical Biology*. 2006;2:33.
- [55] Yu Y, Hamza A, Zhang T, Gu M, Zou P, Newman B, et al. Withaferin A targets heat shock protein 90 in pancreatic cancer cells. *Biochemical Pharmacology*. 2010;79:542.
- [56] Geng F, Tang L, Li Y, Yang L, Choi KS, Kazim AL, et al. Allyl Isothiocyanate Arrests Cancer Cells in Mitosis, and Mitotic Arrest in Turn Leads to Apoptosis via Bcl-2 Protein Phosphorylation. *Journal of Biological Chemistry*. 2011;286:32259.
- [57] Antony ML, Lee J, Hahm ER, Kim SH, Marcus AI, Kumari V, et al. Growth arrest by the antitumor steroidal lactone withaferin A in human breast cancer cells is associated with down-regulation and covalent binding at cysteine 303 of  $\beta$ -tubulin. *Journal of Biological Chemistry*. 2014;289:1852.
- [58] Tolborg K, Jørgensen MR, Sist M, Mamakhel A, Overgaard J, Iversen BB. Low - Barrier Hydrogen Bonds in Negative Thermal Expansion Material H3 [Co (CN) 6]. *Chemistry—A European Journal*. 2019;25:6814-22.
- [59] Fitch CA, Platzer G, Okon M, Garcia - Moreno E B, McIntosh LP. Arginine: Its pKa value revisited. *Protein science*. 2015;24:752-61.
- [60] Dwyer JJ, Gittis AG, Karp DA, Lattman EE, Spencer DS, Stites WE. High apparent dielectric constants in the interior of a protein reflect water penetration. *Biophysical journal*. 2000;79:1610-20.

**Table S1. Data collection and refinement statistics.**

|                        | PAC                                                   | Compound 9                                            | Compound 11                                           | BML284                                                |
|------------------------|-------------------------------------------------------|-------------------------------------------------------|-------------------------------------------------------|-------------------------------------------------------|
| <b>Data collection</b> |                                                       |                                                       |                                                       |                                                       |
| Space group            | <i>P</i> 2 <sub>1</sub> 2 <sub>1</sub> 2 <sub>1</sub> | <i>P</i> 2 <sub>1</sub> 2 <sub>1</sub> 2 <sub>1</sub> | <i>P</i> 2 <sub>1</sub> 2 <sub>1</sub> 2 <sub>1</sub> | <i>P</i> 2 <sub>1</sub> 2 <sub>1</sub> 2 <sub>1</sub> |



|                                    |                         |      |      |                         |       |      |                         |       |      |                       |       |      |
|------------------------------------|-------------------------|------|------|-------------------------|-------|------|-------------------------|-------|------|-----------------------|-------|------|
| Cell dimensions                    |                         |      |      |                         |       |      |                         |       |      |                       |       |      |
| $a, b, c$ (Å)                      | 77.9                    | 78.0 |      | 105.3                   | 157.5 |      | 105.3                   | 157.7 |      | 105.6                 | 158.1 |      |
|                                    | 177.6                   |      |      | 182.4                   |       |      | 181.5                   |       |      | 181.3                 |       |      |
| $\alpha, \beta, \gamma$ (°)        | 90.0                    | 90.0 | 90.0 | 90.0                    | 90.0  | 90.0 | 90.0                    | 90.0  | 90.0 | 90.0                  | 90.0  | 90.0 |
| Resolution (Å)                     | 40.0-2.65 (2.71-2.65) * |      |      | 50.0-2.70 (2.76-2.70) * |       |      | 50.0-2.73 (2.79-2.73) * |       |      | 119.2-2.70(2.86-2.70) |       |      |
| $R_{\text{pim}}$                   | 4.9 (40.3)              |      |      | 6 (46.7)                |       |      | 7.5 (33.3)              |       |      | 7.3(59.3)             |       |      |
| $I/\sigma I$                       | 16.3 (2.1)              |      |      | 12.9 (2.0)              |       |      | 10.2 (2.3)              |       |      | 14.5(1.4)             |       |      |
| Completeness (%)                   | 99.9 (99.4)             |      |      | 100 (100)               |       |      | 100 (100)               |       |      | 99.8(64.6)            |       |      |
| Redundancy                         | 7.1 (6.8)               |      |      | 6.7(6.4)                |       |      | 6.7 (6.8)               |       |      | 10.9(10.5)            |       |      |
| Refinement                         |                         |      |      |                         |       |      |                         |       |      |                       |       |      |
| Resolution (Å)                     | 39.8-2.66               |      |      | 47.0-2.70               |       |      | 48.1-2.73               |       |      | 48.3-2.70             |       |      |
| No. reflections                    | 85,700                  |      |      | 82,400                  |       |      | 79,992                  |       |      | 83978                 |       |      |
| $R_{\text{work}}/ R_{\text{free}}$ | 22.2/25.7               |      |      | 22.4/24.9               |       |      | 20.7/ 24.2              |       |      | 22.8/27.1             |       |      |
| No. atoms                          |                         |      |      |                         |       |      |                         |       |      |                       |       |      |
| Protein                            | 17413                   |      |      | 17273                   |       |      | 17903                   |       |      | 17458                 |       |      |
| Ligand/ion                         | 235                     |      |      | 215                     |       |      | 227                     |       |      | 231                   |       |      |
| Water                              | 381                     |      |      | 351                     |       |      | 272                     |       |      | 13                    |       |      |
| B-factors                          |                         |      |      |                         |       |      |                         |       |      |                       |       |      |
| Protein                            | 41                      |      |      | 42                      |       |      | 45                      |       |      | 65                    |       |      |
| Ligand/ion                         | 47                      |      |      | 44                      |       |      | 46                      |       |      | 72                    |       |      |
| Water                              | 43                      |      |      | 45                      |       |      | 43                      |       |      | 41                    |       |      |
| R.m.s deviations                   |                         |      |      |                         |       |      |                         |       |      |                       |       |      |
| Bond lengths (Å)                   | 0.003                   |      |      | 0.004                   |       |      | 0.003                   |       |      | 0.006                 |       |      |
| Bond angles (°)                    | 0.661                   |      |      | 0.800                   |       |      | 0.698                   |       |      | 0.767                 |       |      |

\*Highest resolution shell is shown in parenthesis.



482 **Table S2.** Vibrational energy levels ( $\epsilon$  in kcal/mol) for the first three states of  
483 the proton in hydrogen bond between  $\beta$ Glu198 and compounds.

|               | State | $\epsilon$ | $\Delta \epsilon$                                                              |                                 |
|---------------|-------|------------|--------------------------------------------------------------------------------|---------------------------------|
| <b>PAC</b>    | 0     | 1.46       |                                                                                |                                 |
|               | 1     | 2.63       | $\epsilon_{10} = \epsilon_{\text{State 1}} - \epsilon_{\text{State 0}} = 1.17$ | $\epsilon_{10} < \epsilon_{21}$ |
|               | 2     | 3.90       | $\epsilon_{21} = \epsilon_{\text{State 2}} - \epsilon_{\text{State 1}} = 1.27$ |                                 |
| <b>Noc</b>    | 0     | 1.87       |                                                                                |                                 |
|               | 1     | 3.85       | $\epsilon_{10} = \epsilon_{\text{State 1}} - \epsilon_{\text{State 0}} = 1.98$ | $\epsilon_{10} > \epsilon_{21}$ |
|               | 2     | 4.87       | $\epsilon_{21} = \epsilon_{\text{State 2}} - \epsilon_{\text{State 1}} = 1.02$ |                                 |
| <b>Pli</b>    | 0     | 3.20       |                                                                                |                                 |
|               | 1     | 8.06       | $\epsilon_{10} = \epsilon_{\text{State 1}} - \epsilon_{\text{State 0}} = 4.86$ | $\epsilon_{10} > \epsilon_{21}$ |
|               | 2     | 11.67      | $\epsilon_{21} = \epsilon_{\text{State 2}} - \epsilon_{\text{State 1}} = 3.61$ |                                 |
| <b>BML284</b> | 0     | 1.33       |                                                                                |                                 |
|               | 1     | 2.34       | $\epsilon_{10} = \epsilon_{\text{State 1}} - \epsilon_{\text{State 0}} = 1.01$ | $\epsilon_{10} < \epsilon_{21}$ |
|               | 2     | 3.82       | $\epsilon_{21} = \epsilon_{\text{State 2}} - \epsilon_{\text{State 1}} = 1.48$ |                                 |

484

**Figure 1**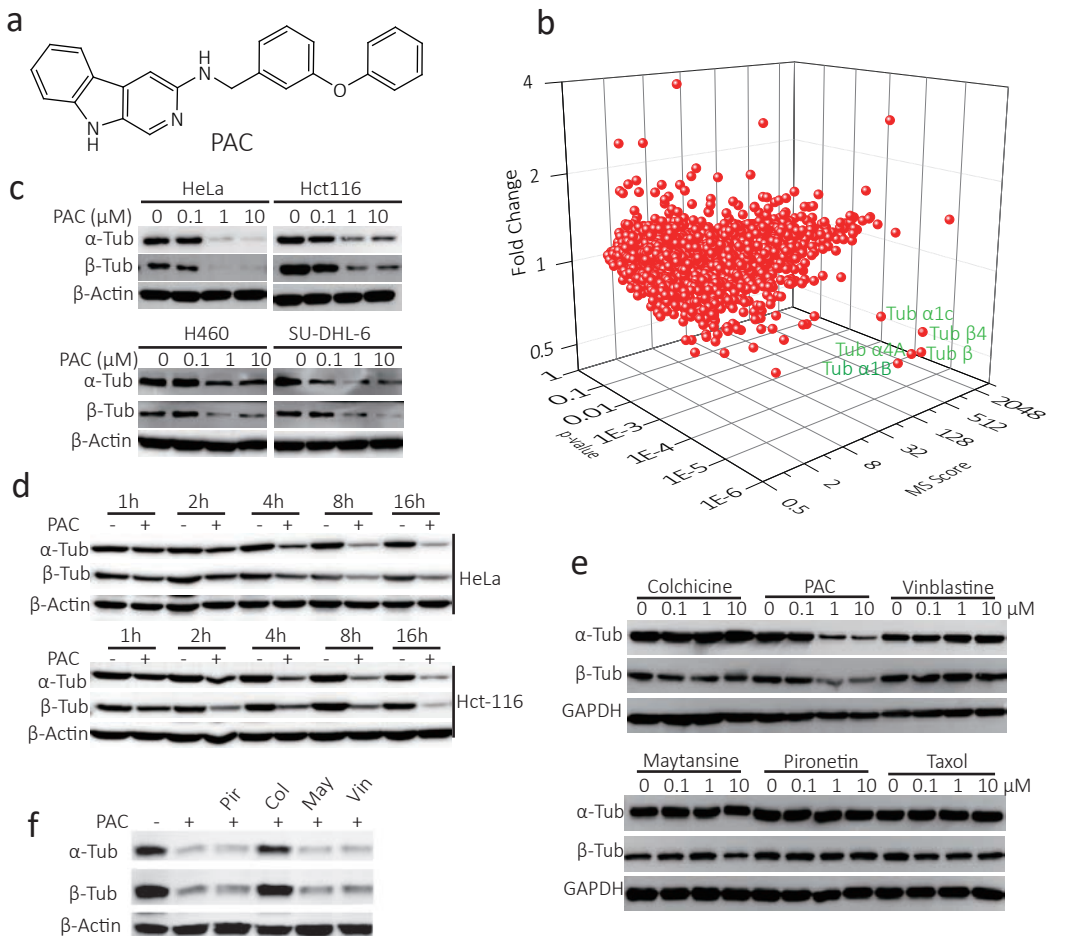**Figure 1: PAC selectively downregulates the protein level of  $\alpha\beta$ -tubulin heterodimers. (a) Chemical structure of PAC.**

**(b)** Proteome-wide analysis of HeLa cells treated with 1  $\mu$ M PAC or DMSO alone for 6 hours using tandem mass tag quantitative proteomics. Each point represents the ratio of mean protein levels of three biological repetition in PAC- versus DMSO-treated cells. **(c)** Immunoblot analysis of  $\alpha$ - and  $\beta$ -tubulin protein levels in HeLa, Hct116, H460 and SU-DHL-6 cells treated with the indicated concentrations of PAC for 24 h.  $\beta$ -Actin was used as loading control. Results are representative of three independent experiments. **(d)** Time course of  $\alpha$ - and  $\beta$ -tubulin protein levels in HeLa and Hct116 cells treated with 1  $\mu$ M PAC or DMSO.  $\beta$ -Actin was used as the loading control. Immunoblot results are representative of three independent experiments. **(e)** Comparing the tubulin degradation effect of PAC with conventional tubulin inhibitors. HeLa cells were treated with different concentrations of PAC, colchicine, vinblastine, maytansine, pironetin and taxol for 16 hours, then  $\alpha$ - and  $\beta$ -tubulin protein levels were detected by immunoblot. Results are representative of two independent experiments. **(f)** Inhibition of  $\alpha\beta$ -tubulin heterodimers degradation by tubulin inhibitors. HeLa cells were treated with or without 1  $\mu$ M pironetin, colchicine, maytansine and vinblastine for 1 hour before treated with or without 1  $\mu$ M PAC for 16 hours. Then cell  $\alpha$ - and  $\beta$ -tubulin protein levels were monitored by immunoblot analysis. Results are representative of three independent experiments.

**Figure 2**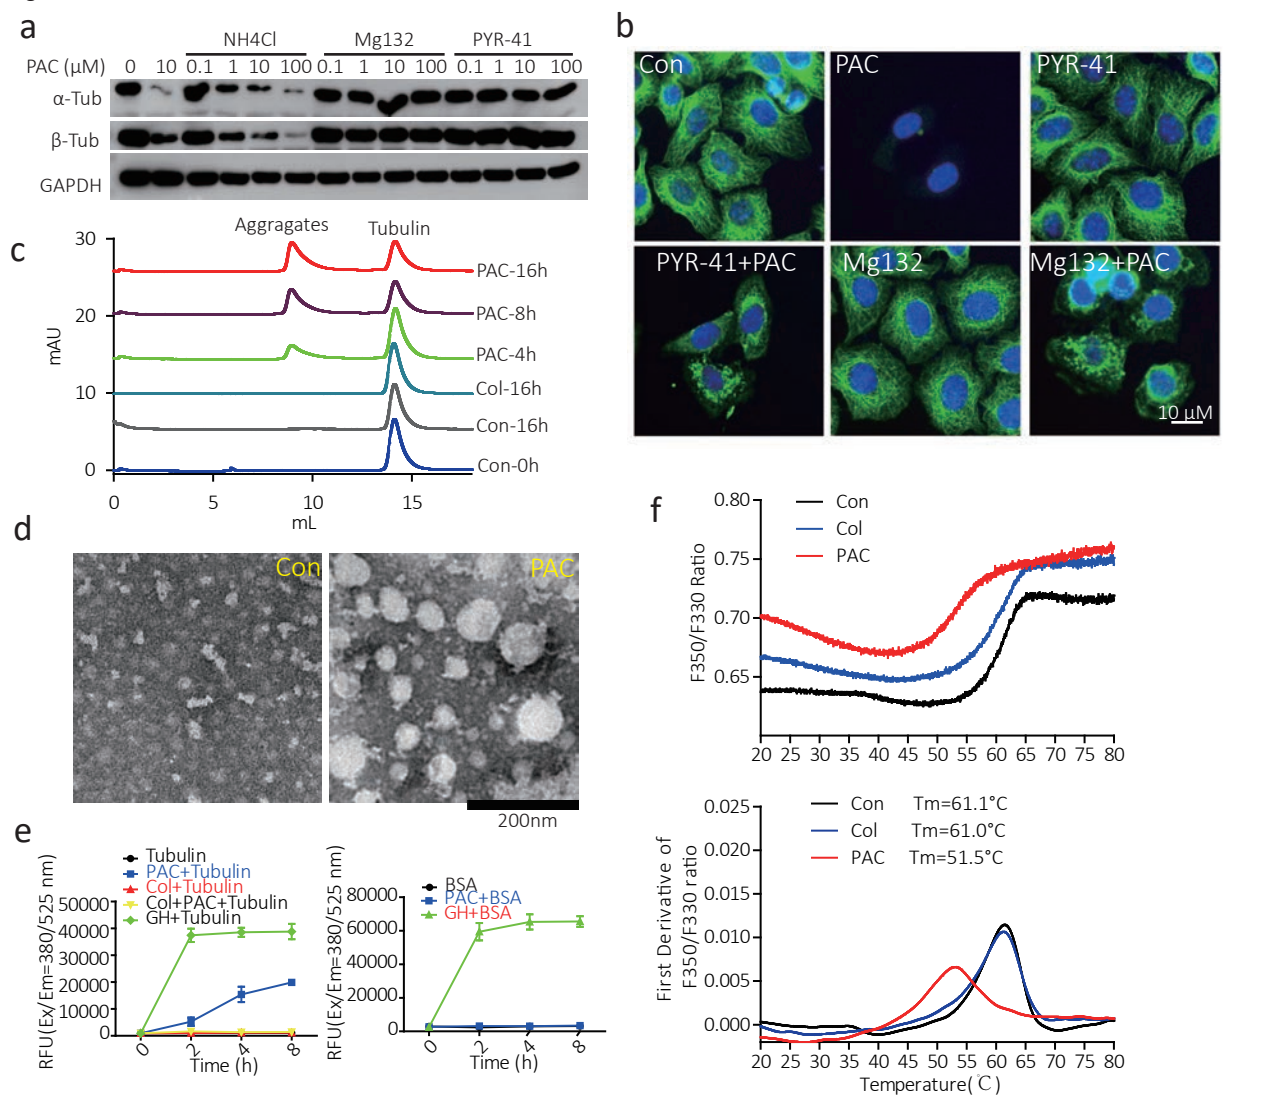

**Figure 2: PAC promotes tubulin destabilization and aggregation.** (a) Proteasome and ubiquitin inhibitors rescue PAC-induced tubulin degradation. HeLa cells were pretreated with 20 mM NH4Cl, 20  $\mu\text{M}$  Mg132 or 20  $\mu\text{M}$  PYR-41 for one hour before the addition of PAC. Results are representative of three independent experiments. (b) PAC induced tubulin aggregation in cytoplasm. HeLa cells were pretreated with Mg132 or PYR-41 for 1 hours before treated with PAC for 4 hours. The tubulin morphology was monitored by immunofluorescence. Results are representative of three independent experiments. (c) Gel filtration assays detection of tubulin aggregation. Purified tubulin was dissolved to 3 $\mu\text{M}$  in PEM buffer at room temperature before incubated with different compounds for different times. After incubation, samples were analyzed by a gel filtration assay. Results are representative of two independent experiments. (d) Transmission electron microscopy (TEM) detection of tubulin. Purified tubulin (10  $\mu\text{M}$ ) was incubated with or without 20 $\mu\text{M}$  PAC for 4 hours at room temperature, the images were taken by TEM. Results are representative of two independent experiments. (e) PAC promotes purified tubulin denaturation. Tubulin (1 $\mu\text{M}$ ) was incubated with guanidine hydrochloride (GH) or other compounds or DMSO for 2, 4 or 8 hours at room temperature. Then master reaction mix was added to the samples and incubated for another 30min. At last the fluorescent adduct were detected by a Biotech Gen5 spectrophotometer ( $\lambda_{\text{ex}} = 380/\lambda_{\text{em}} = 525 \text{ nm}$ ). Data are shown as the mean  $\pm$  SD ( $n = 3$ ). (f) Thermal unfolding curves of DMSO, PAC (30  $\mu\text{M}$ ) or colchicine (30  $\mu\text{M}$ ) treated purified tubulin (3  $\mu\text{M}$ ) by a differential scanning fluorimetry (DSF) method. Plots of the fluorescence F350/F330 ratio (up) and the first derivative of F350/F330 ratio (low) are shown. Results are representative of three independent experiments.

**Figure 3**

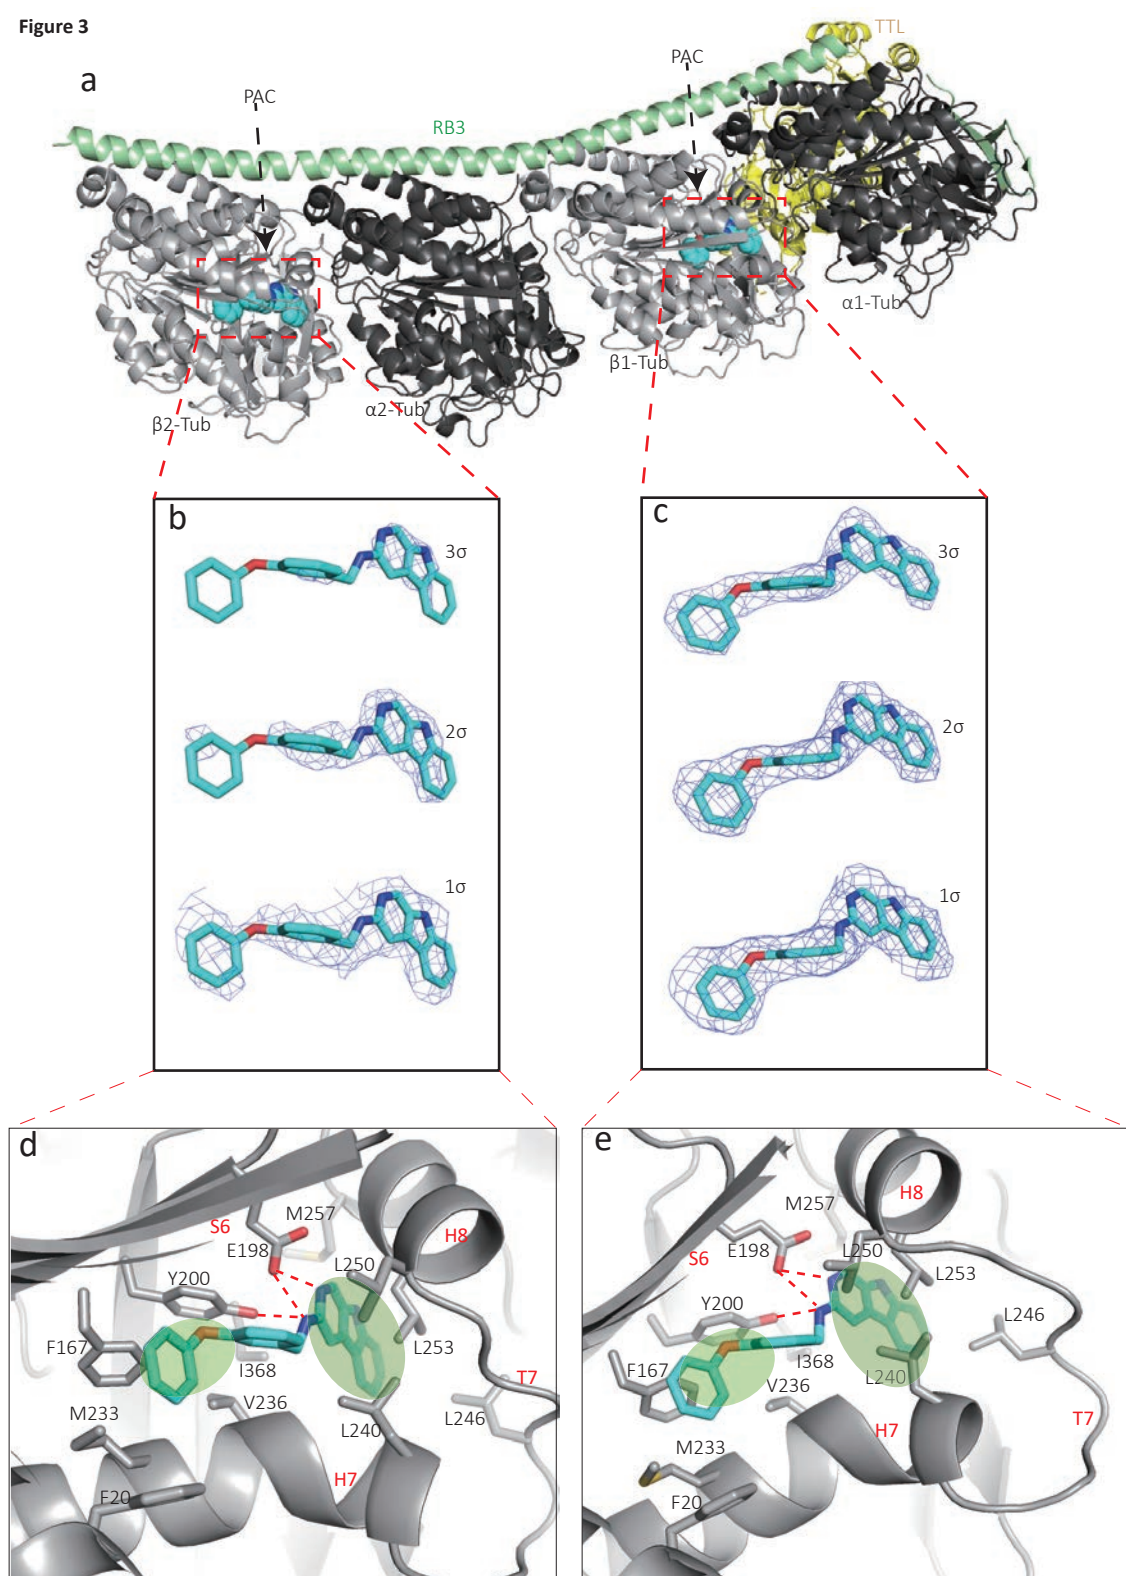

**Figure 3: Crystal structure of PAC-tubulin complex.** (a) Overall structure of tubulin-PAC complex. The RB3-SLD is colored green, TTL is yellow,  $\alpha$ -tubulin is black,  $\beta$ -tubulin is grey, and PAC is cyan. PAC is shown as spheres. (b, c) Electron densities of PAC on (b)  $\beta$ 2-tubulin or (c)  $\beta$ 1-tubulin. The Fo-Fc omit map is colored light blue and contoured at  $3\sigma$ ,  $2\sigma$  and  $1\sigma$ . (d, e) Interactions between PAC and (d)  $\beta$ 2-tubulin and (e)  $\beta$ 1-tubulin. Residues that make interactions with PAC are shown as sticks and are labeled. The hydrophobic centers are indicated by green semitransparent ovals (small: center I; big: center II). Hydrogen bonds are drawn with red dashed lines.

**Figure 4**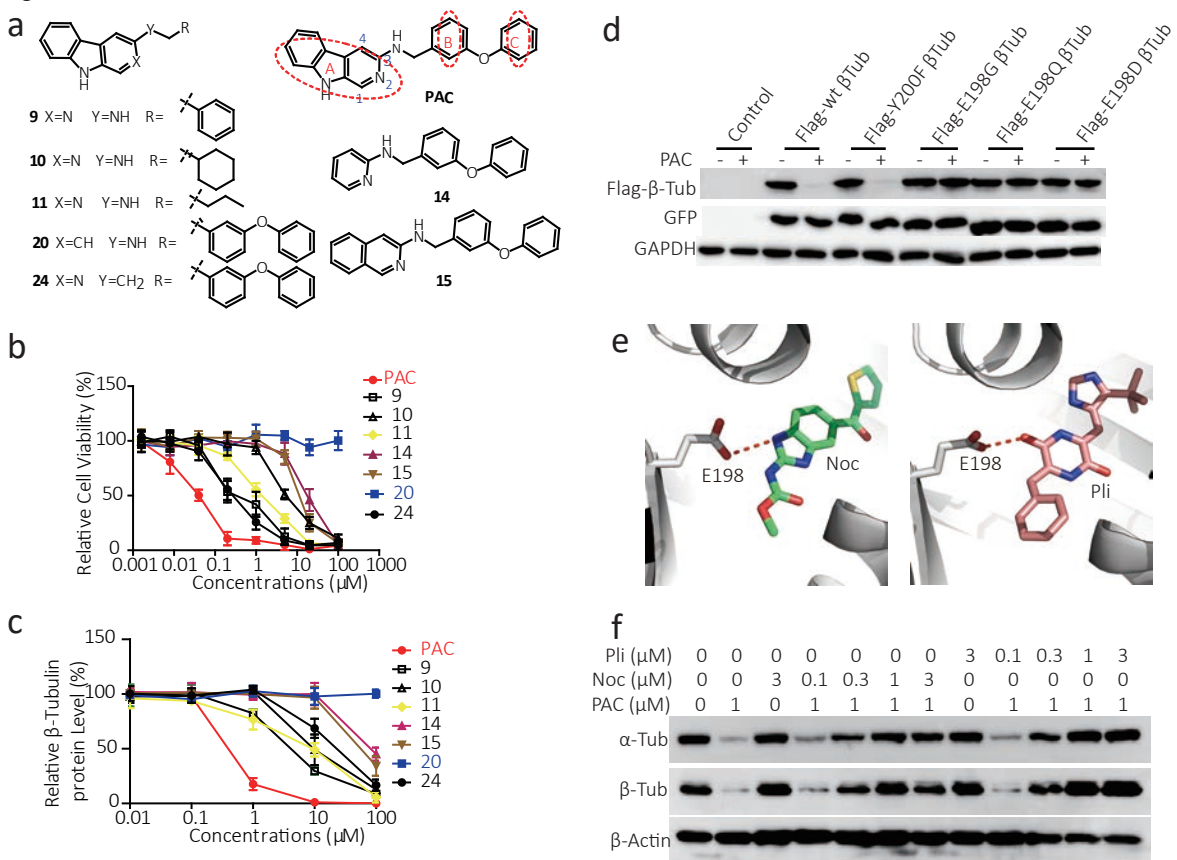

**Figure 4: The pyridine nitrogen of PAC and Glu198 of β-tubulin mediate the tubulin degradation.** (a) Chemical structure of synthetic PAC derivatives. (b) Growth inhibitory curves of PAC derivatives in HeLa cells. Cells were treated with different concentrations of indicated compound for 48 hours, cell viability were monitored by MTT assay. Data are shown as the mean ± SD (n = 3). (c) Tubulin degradation activity of PAC derivatives. HeLa cells were treated with different concentrations of indicated compound for 16 hours, the tubulin protein levels were monitored by immunoblot. Densitometric quantification of immunoblot was performed by Image Quant TL software, Data are shown as the mean ± SD (n = 3). (d) Effect of PAC on tubulin mutants. MSCV-IRES-GFP vectors expressing both GFP and wild type or mutant Flag-β-tubulin were transfected to HeLa cells. After 24 hours, cells were treated with or without PAC for 16 hours. Then the protein level of Flag-tubulin and GFP were detected by immunoblot. GAPDH were used as loading control. Results are representative of three independent experiments. (e) Close-up views of the interaction between βGlu198 with nocodazole (Noc) and plinabulin (Pli). (f) Inhibition of tubulin heterodimers degradation by colchicine site tubulin inhibitors. HeLa cells were treated with different concentrations nocodazole and plinabulin for one hour before addition of PAC. Results are representative of two independent experiments.



**Figure 5****a**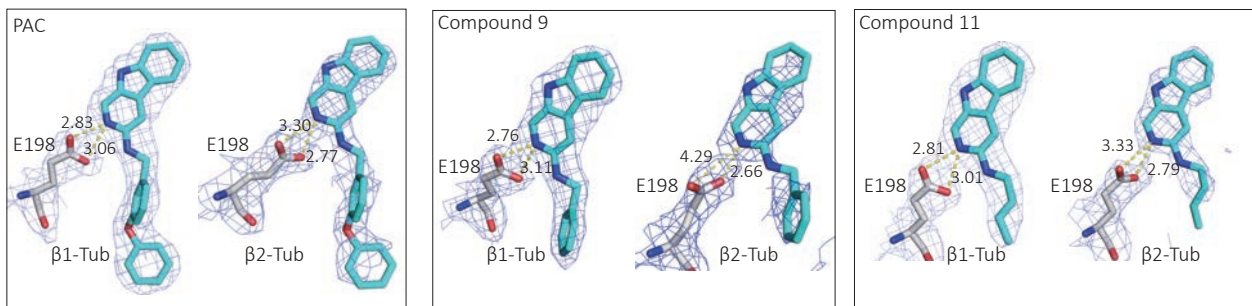**b**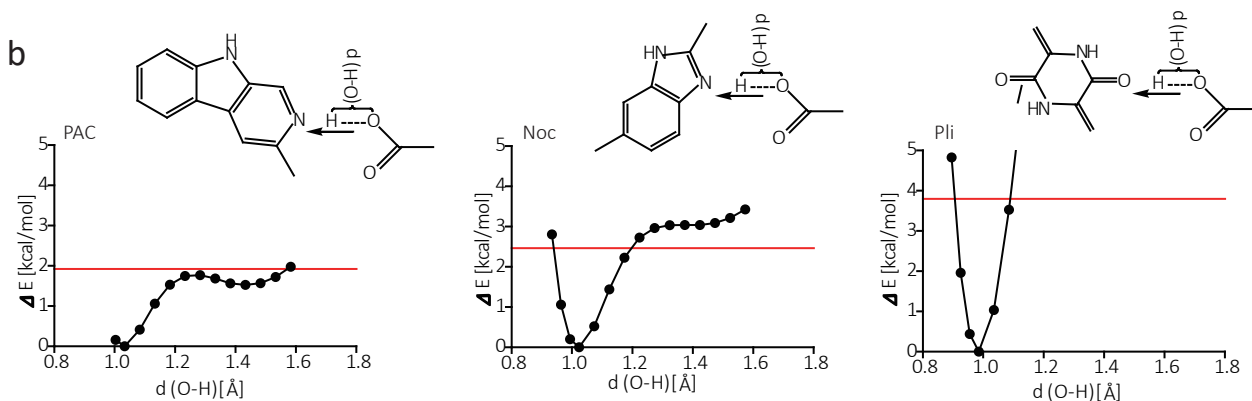**c**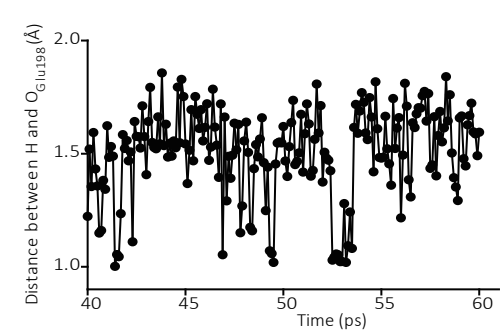**d**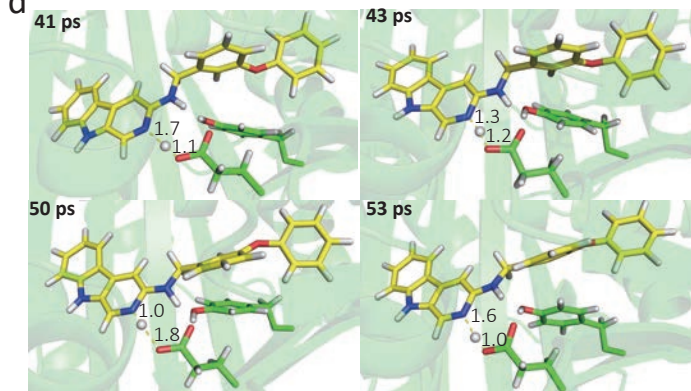

**Figure 5: An LBHB between PAC and  $\beta$ Glu198 mediates tubulin degradation.** (a) Distance between nitrogen of compounds (PAC, compound 9 and compound 11) to  $\beta$ Glu198. The 2Fo-Fc omit map is colored light blue and contoured at 1 $\sigma$ . Compounds and  $\beta$ Glu198 is shown in sticks and colored in cyan and grey respectively. (b) Energy profiles along the proton transfer coordinate for H-bond donor-acceptor pairs of the OGU198-NPAC, OGU198-NNoc and OGU198-OPli hydrogen bonds. The red lines are the sum of zero-point vibrational energy and KT (0.596 kcal/mol). (c) The distance between proton and O of GLU198 in the 40 to 60 ps QM/MM MD simulation. (d) Snapshots of tubulin-PAC complex along the dynamic simulation time. For clarity, the water molecules have been removed. The distances between protonated and the O atom/N atom are marked in the figure.

**Figure 6**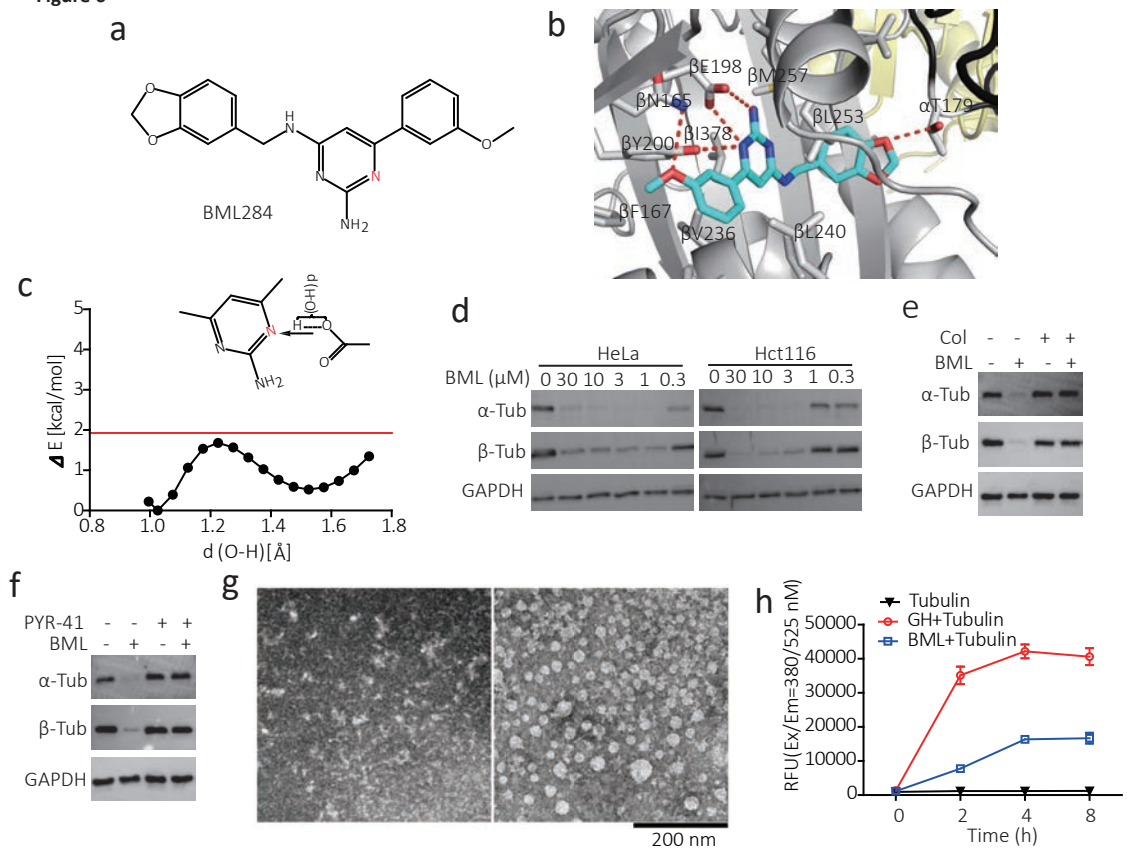

**Figure 6: Identification of a new tubulin degrader with the LBHB mediated degradation mechanism.** (a) Chemical structure of BML284. (b) Interactions between BML284 and tubulin. Residues that make interactions with BML284 are shown as sticks and are labeled. Hydrogen bonds are drawn with red dashed lines. (c) Energy profiles along the proton transfer coordinate for H-bond donor-acceptor pairs of the indicated hydrogen bond in tubulin-BML284 complexes. The red line is the sum of zero-point vibrational energy and KT (0.596 kcal/mol). (d) Immunoblot analysis of  $\alpha$ - and  $\beta$ -tubulin protein levels in HeLa, Hct116 cells treated with the indicated concentrations of BML284 for 24 h. GAPDH was used as loading control. Results are representative of three independent experiments. (e) Colchicine blocks BML284-induced tubulin degradation. HeLa cells were pretreated with 3  $\mu$ M colchicine for one hour before treated with 3  $\mu$ M BML284 for 16 hours and then subjected to immunoblot analysis of  $\alpha$ - and  $\beta$ -tubulin protein. Results are representative of three independent experiments. (f) Ubiquitin inhibitor PYR-41 rescue BML284-induced tubulin degradation. HeLa cells were pretreated 20  $\mu$ M PYR-41 for one hour before treated with BML284 for 16 hours and then subjected to immunoblot analysis of  $\alpha$ - and  $\beta$ -tubulin protein. Results are representative of three independent experiments. (g) Purified porcine tubulin (10  $\mu$ M) was incubated with or without 20  $\mu$ M BML284 for 4 hours at room temperature, the images were taken by TEM. Results are representative of two independent experiments. (h) BML284 promotes purified tubulin denaturation. Tubulin (1  $\mu$ M) was incubated with guanidine hydrochloride (GH) or BML284 for 2, 4 or 8 hours at room temperature. Then master reaction mix was added to the samples and incubated for another 30 min. At last the fluorescent adduct were detected by a Biotech Gen5 spectrophotometer ( $\lambda_{ex}$  = 380/ $\lambda_{em}$  = 525 nm). Data are shown as the mean  $\pm$  SD ( $n$  = 3).

**Figure S1**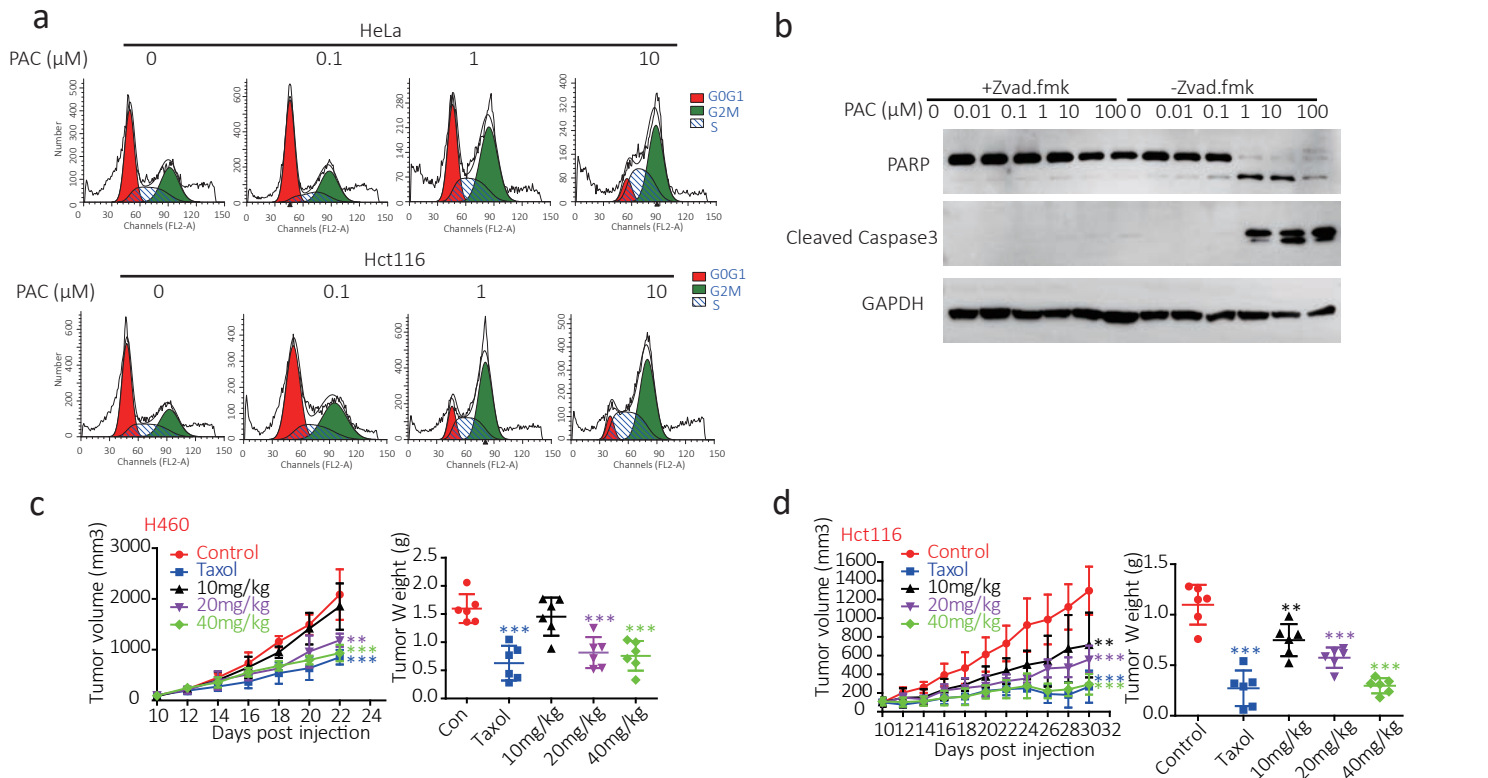

**Figure S1: PAC induces G2/M phase cell cycle arrest and apoptosis and exhibits in vivo anticancer activity.** (a) Flow cytometric histograms of various concentrations of PAC treated HeLa and Hct116 cells stained with propidium iodide. Results are representative of two independent experiments. (b) HeLa cells were treated with or without pan-caspase inhibitor Zvad.fmk for 1 hour before treated various concentrations of PAC for 48hours, then expression of poly ADP-ribose polymerase (PARP) and cleaved-caspase 3 were detected by immunoblot. GAPDH was loading control. Results are representative of two independent experiments. (c) In vivo antitumor activity of PAC (two days a time, tail vein injection) and taxol (30mg/kg, once a week, intraperitoneal injection) against H460 xenografts. Left: Time curve of tumor growth. Points showed as mean  $\pm$  SD (n=6). Right: Bar chart of tumor weight. (d) In vivo antitumor activity of PAC (two days a time, tail vein injection) and taxol (30mg/kg, once a week, intraperitoneal injection) against Hct116 xenografts. Left: Time curve of tumor growth. Points showed as mean  $\pm$  SD (n=6). Right: Bar chart of tumor weight.



Figure S2

a

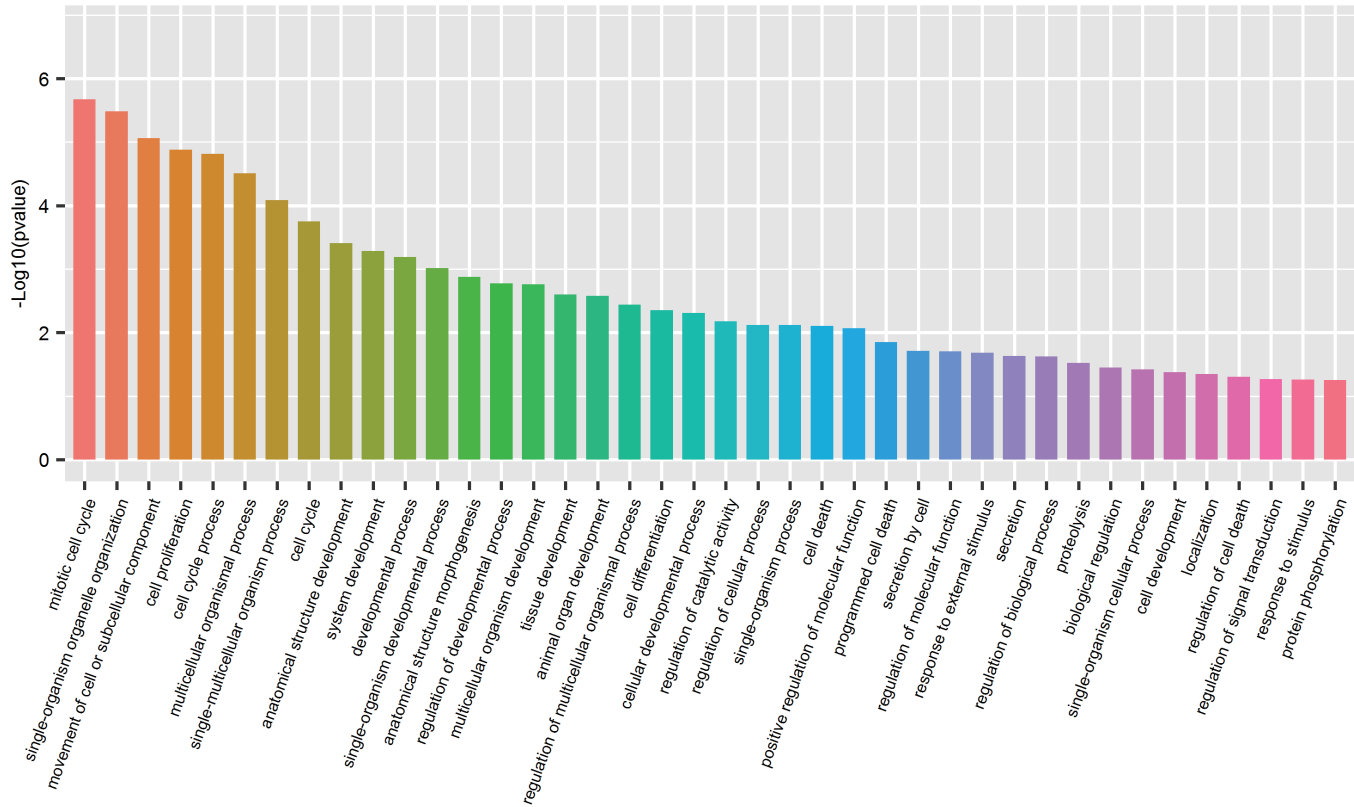

b

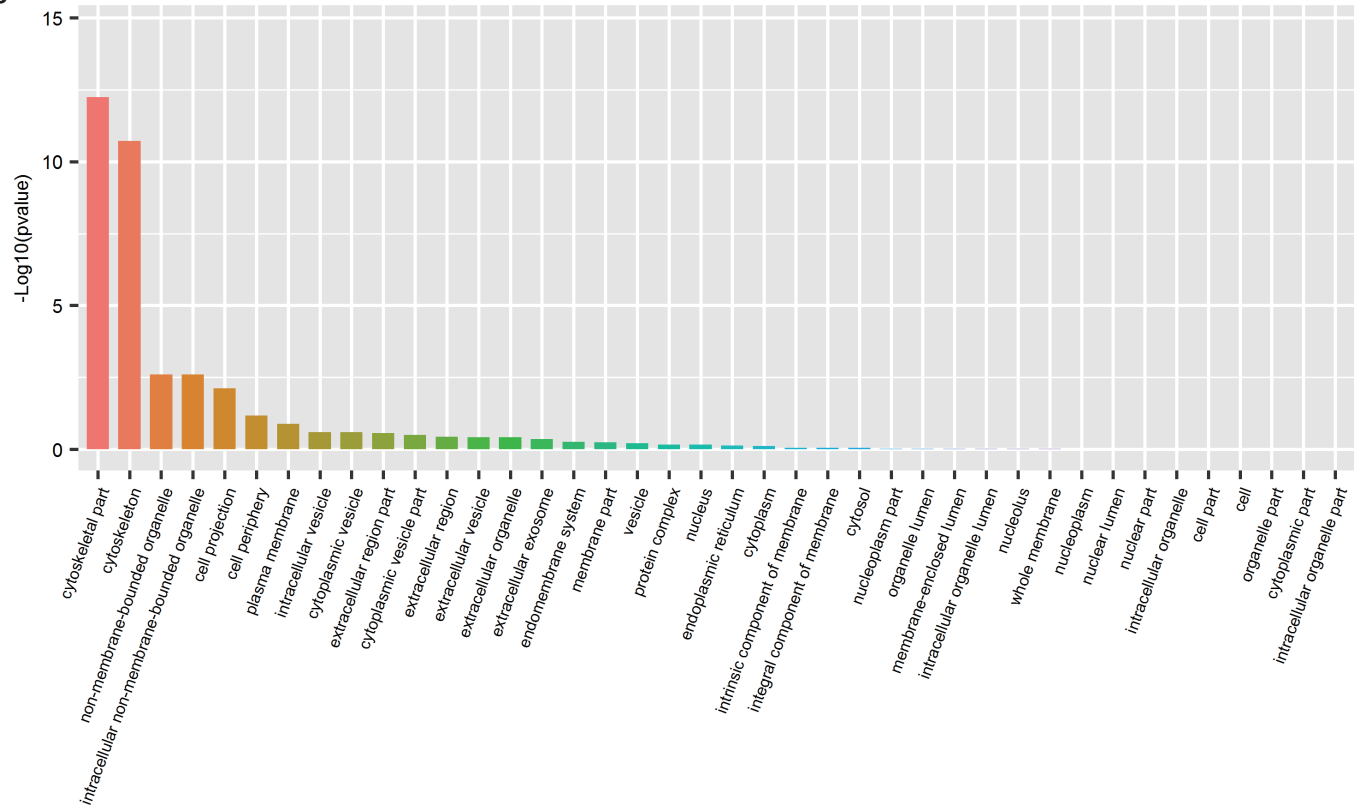

**Figure S2: Biological processes and cellular components analysis of the quantitative proteomic data.** (a) Rank order list of the most statistically enriched biological processes changes by PAC (Go Enrichment Analysis of biological processes) (b) Rank order list of the most statistically enriched cellular components changes by PAC (Go Enrichment Analysis of components changes).

**Figure S3**

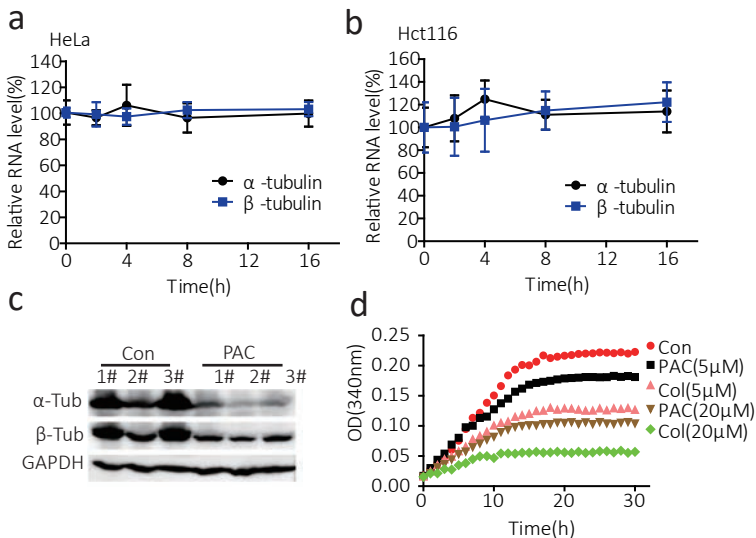

**Figure S3: Supplementary figure for PAC induced tubulin degradation.** (a, b) Time course of  $\alpha$ - and  $\beta$ -tubulin mRNA levels in (a) HeLa and (b) Hct116 cells treated with 1  $\mu$ M PAC or DMSO. Results are shown as the mean  $\pm$  SD (n = 3). (c) Analysis of tubulin protein levels of Hct116 xenograft tissue. Tumor bearing mice were administrated with PAC at the dose of 80 mg/kg once through tail vein injection. Then mice were sacrificed after 24 hours and xenograft tissues were collected for immunoblot to detect  $\alpha$ - and  $\beta$ -tubulin protein. Results are representative of two independent experiments. (d) Indicated concentrations of compounds were co-incubated with tubulin (3mg/ml) at 37  $^{\circ}$ C, absorbance at 340 nm were detected every one minutes for 30 minutes. Results are representative of two independent experiments.

**Figure S4**

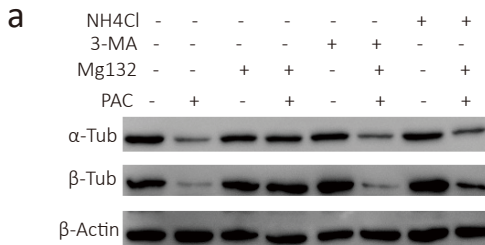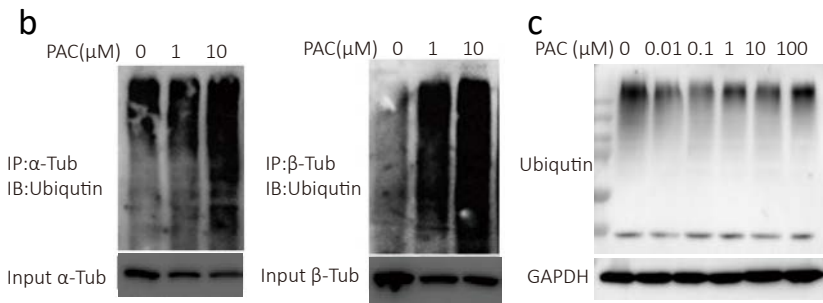

**Figure S4: PAC promotes ubiquitin- and proteasome-dependent degradation of tubulins.**

**(a)** Chemical rescue of PAC induced tubulin degradation. HeLa cells were pretreated with Mg132, NH<sub>4</sub>Cl or 3-MA for 1hours before treated with PAC. Results are representative of three independent experiments. **(b)** HeLa cells were treated with 0, 1or 10μM PAC for 6hours, α- or β-tubulin were immunoprecipitated from the lysates, and ubiquitinated α- or β-tubulin were detected with anti-ubiquitin antibodies. Results are representative of three independent experiments. **(c)** HeLa cells were treated with indicated concentrations of PAC for 16hours, then total protein was extracted and analyzed by immunoblot for ubiquitin. Results are representative of two independent experiments.

**Figure S5**

**a**

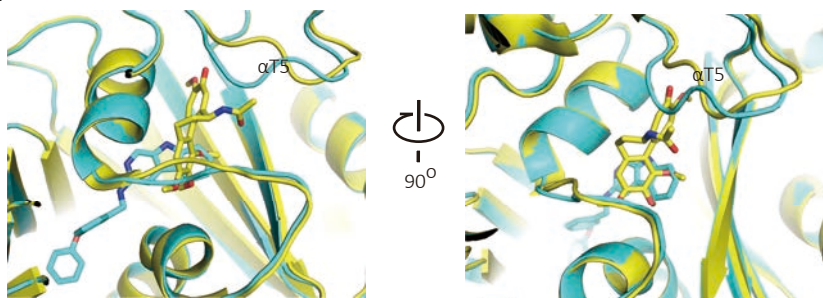

**b**

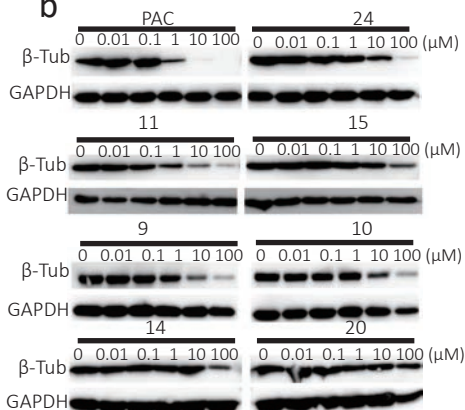

**c**

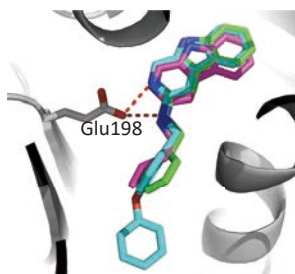

**d**

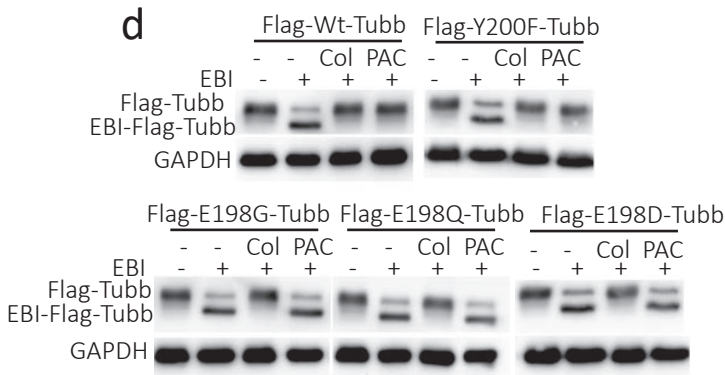

**Figure S5: Supplementary figure to support an LBHB between PAC and  $\beta$ Glu198 mediates tubulin degradation.** (a) Comparison of the tubulin binding modes between PAC and colchicine. The complex structures of tubulin-PAC (cyan) and Tubulin-colchicine (PDB ID: 4O2B, yellow) are superimposed. (b) Tubulin degradation activity of PAC derivatives. HeLa cells were treated with different concentrations of indicated compound for 16 hours, the  $\beta$ -tubulin protein levels were monitored by immunoblot. Results are representative of two independent experiments. (c) Comparison of the tubulin binding modes of PAC, compound 9 and 11. The structures of tubulin complexed with PAC (blue), compound 9 (green) and compound 11 (purple) are superimposed. (d) Identification the binding of PAC to wild type or mutant tubulins by EBI competition assay. MSCV-IRES-GFP vectors expressing both EGFP and wild type or mutant Flag- $\beta$ -tubulin were transfected to HeLa cells for 24 hours. Then cells were treated with 10 $\mu$ M colchicine and 10 $\mu$ M PAC for 2 hours before treated with 100 $\mu$ M EBI for another 2 hours. Flag- $\beta$ -tubulin level were detected by immunoblot. Results are representative of two independent experiments.

**Figure S6**

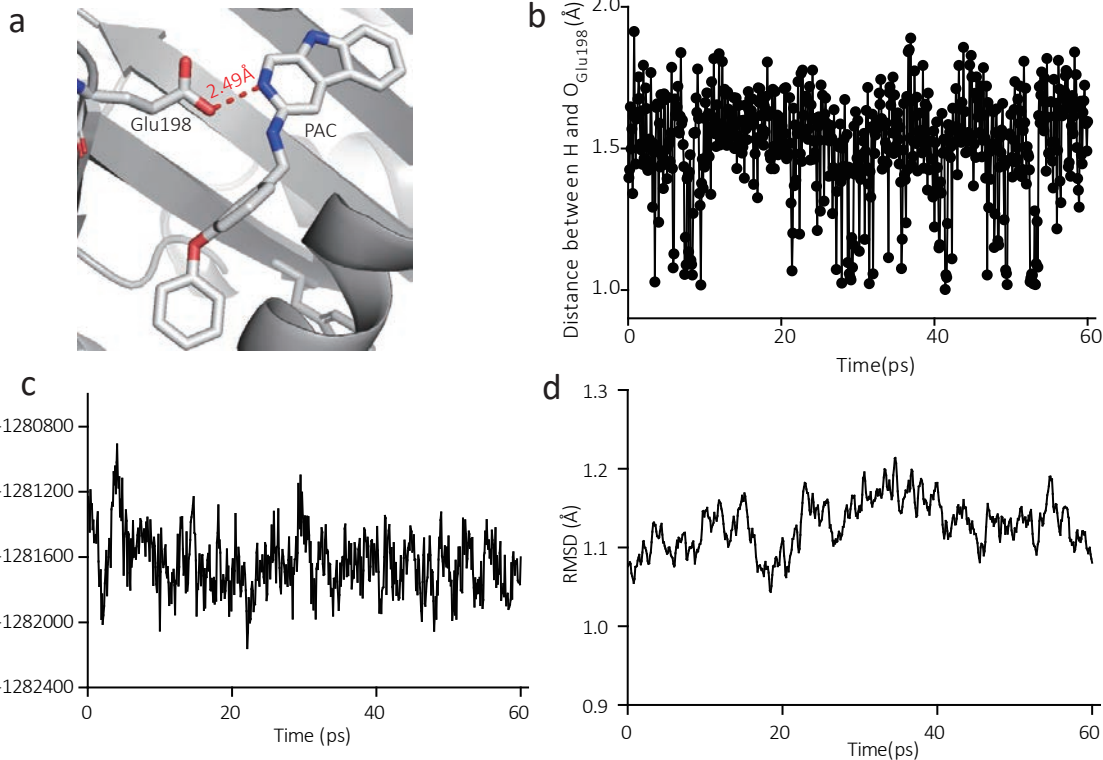

**Figure S6: QM/MM MD simulation results.** (a) Close-up view of the interaction between  $\beta$  Glu198 with PAC in QM/MM optimized structure showed the distance of the OGlu198-NPAC hydrogen bond. (b) The distance between proton and O of Glu198 in the 0 to 60 ps QM/MM MD simulation. (c) The total potential energy of the 0 to 60ps trajectory for PAC-tubulin complex. (d) Root mean square deviations (RMSDs) for 0 to 60 ps QM/MM MD simulation (QM: B3LYP/6-31G).

**Figure S7**

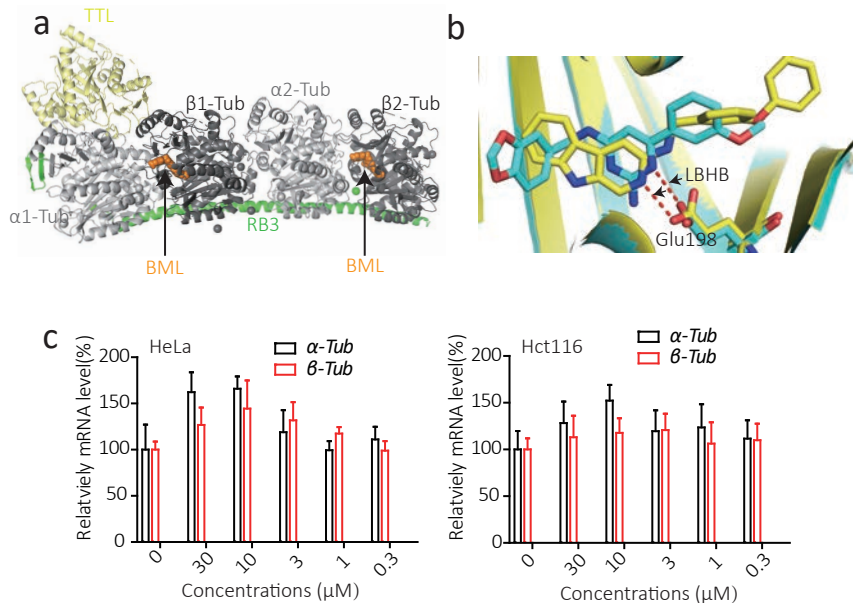

**Figure S7: Supplementary figures to support BML284 induces tubulin degradation with the LBHB mediating degradation mechanism.** (a) Overall structure of tubulin-BML284 crystal complex. The RB3-SLD is colored green, TTL is yellow,  $\alpha$ -tubulin is grey,  $\beta$ -tubulin is black, BML284 is orange and shown as spheres. (b) Comparison of the tubulin binding modes of PAC and BML284. The structures of tubulin complexed with PAC (cyan) and BML284 (yellow) are superimposed. (c) The relative mRNA levels of  $\alpha$ - and  $\beta$ -tubulin in HeLa and Hct116 cells treated with indicated concentrations of BML284 for 16hours were tested by Quantitative PCR, and the data are shown as the mean  $\pm$  SD ( $n = 3$ ).
